# Supplementary material for: The Contribution of Neutral and Environmentally Dependent Processes in Driving Population and Lineage Divergence in Taiwania (Taiwania cryptomerioides)
Source: Front Plant Sci. 2018 Aug 8;9:1148. doi: 10.3389/fpls.2018.01148 (PMC6092574; doi:10.3389/fpls.2018.01148)
Supplement: Data Sheet 1 — Comma-separated value file for scored 1413 AFLP markers of the eight populations (n = 102) of Taiwania. The first three columns recorded the information of sample ID, lineage, and population. The rest of columns represent presence/absence of markers. [file Data_Sheet_1.CSV]

SampleID	Lineage	Pop	P1_101	P1_103	P1_104	P1_109	P1_112	P1_114	P1_117	P1_120	P1_128	P1_130	P1_138	P1_144	P1_150	P1_152	P1_155	P1_157	P1_162	P1_164	P1_166	P1_168	P1_171	P1_175	P1_178	P1_181	P1_184	P1_186	P1_189	P1_195	P1_197	P1_200	P1_202	P1_206	P1_208	P1_213	P1_219	P1_222	P1_224	P1_227	P1_233	P1_235	P1_237	P1_241	P1_243	P1_245	P1_249	P1_251	P1_254
DJ01	Taiwan	DJ	1	1	0	1	1	1	1	1	1	1	1	1	0	0	0	1	0	0	1	1	0	1	1	1	1	0	1	1	1	1	1	0	1	1	0	0	1	0	1	0	0	1	1	1	1	1	0
DJ02	Taiwan	DJ	1	1	0	1	0	0	1	0	1	1	1	0	1	0	0	1	1	1	1	1	1	1	1	0	1	0	0	1	0	0	0	0	1	1	1	0	0	1	0	0	0	1	0	0	0	0	1
DJ03	Taiwan	DJ	1	1	0	1	1	1	1	1	1	1	1	1	0	0	0	1	0	0	1	1	0	1	1	1	1	0	1	1	0	1	1	0	0	1	0	1	1	0	1	0	0	1	1	1	1	1	1
DJ04	Taiwan	DJ	1	1	0	0	1	0	1	1	1	0	0	1	1	1	1	1	0	0	1	0	1	0	1	1	0	0	1	0	0	0	1	0	1	0	1	0	1	0	1	1	0	0	1	1	0	1	0
DJ05	Taiwan	DJ	0	1	0	1	0	1	1	0	0	0	1	1	0	0	0	0	0	0	0	0	0	1	1	1	1	1	1	0	0	0	0	1	1	0	0	0	0	0	0	0	0	0	0	0	1	0	0
DJ06	Taiwan	DJ	1	1	0	1	1	1	1	0	1	1	1	0	1	0	0	1	1	1	1	1	0	1	1	1	0	1	1	1	0	1	1	0	1	1	1	1	1	1	1	0	0	1	1	1	1	1	1
DJ07	Taiwan	DJ	1	1	0	0	1	0	1	1	1	1	1	0	0	1	0	1	1	0	1	0	1	1	0	1	1	0	1	1	1	1	1	0	0	0	1	0	1	0	1	0	0	1	0	1	1	1	0
DJ08	Taiwan	DJ	1	1	1	0	1	1	1	1	1	1	1	1	0	0	0	0	0	0	1	1	1	1	1	1	1	0	1	1	0	1	1	0	0	0	0	0	1	1	1	1	0	1	1	1	1	1	1
DS01	Taiwan	DS	1	1	0	1	1	1	1	1	1	1	0	1	0	0	0	1	0	1	1	0	1	1	1	1	0	0	1	1	0	1	1	0	0	1	1	0	1	1	1	0	0	1	1	1	1	1	0
DS02	Taiwan	DS	0	0	0	1	1	1	0	0	0	0	0	0	0	0	0	0	0	0	0	0	0	0	1	0	0	0	0	0	0	0	0	0	1	0	1	0	0	0	1	0	0	0	0	0	0	0	0
DS03	Taiwan	DS	0	1	1	0	0	0	0	1	0	1	1	0	1	0	0	1	0	0	0	1	1	0	1	1	0	0	1	1	0	1	1	0	1	0	0	0	0	0	1	1	1	0	0	0	0	1	0
DS04	Taiwan	DS	1	1	0	1	1	1	1	1	1	1	1	1	0	0	1	0	0	0	1	1	1	1	1	1	1	1	1	1	0	1	1	0	1	1	1	1	1	0	1	0	0	1	1	1	1	1	0
DS05	Taiwan	DS	1	1	0	1	1	1	1	1	1	1	1	0	0	1	1	1	0	0	1	0	1	1	0	1	1	0	1	1	1	1	1	0	0	1	1	1	1	1	1	0	0	1	0	1	1	1	0
DS06	Taiwan	DS	1	1	0	1	1	0	1	0	1	1	1	0	0	0	1	1	1	0	1	1	1	1	1	1	1	0	1	1	0	1	1	0	1	1	0	1	1	1	0	0	0	0	1	1	0	1	0
DS07	Taiwan	DS	0	1	0	0	1	1	1	1	1	1	1	0	1	0	1	0	1	0	1	1	0	1	1	1	0	1	1	1	0	1	1	0	1	0	0	0	1	1	0	0	0	1	1	1	0	1	0
DS08	Taiwan	DS	0	1	0	0	1	1	1	1	1	1	0	1	1	1	1	0	1	0	1	0	0	0	0	1	1	1	0	1	1	0	1	0	0	1	0	0	1	1	1	0	0	1	0	0	0	1	0
DS09	Taiwan	DS	1	1	0	1	1	0	1	1	1	1	1	1	0	0	0	1	0	1	1	0	1	1	0	1	0	0	1	0	1	1	1	0	1	1	1	1	1	1	1	0	0	1	1	1	1	1	0
DS10	Taiwan	DS	0	1	1	0	1	1	1	1	1	1	1	1	1	0	1	0	1	1	0	1	0	0	0	1	0	0	1	1	0	1	1	1	0	1	1	1	0	0	1	0	0	0	1	0	1	0	0
GS01	Taiwan	GS	0	0	0	1	1	1	1	1	1	1	0	1	1	0	1	1	0	1	1	1	1	1	0	1	1	0	0	1	0	0	1	1	1	1	0	0	1	1	1	0	0	1	1	0	1	0	0
GS02	Taiwan	GS	1	1	1	1	1	1	1	1	1	0	1	0	1	0	1	0	1	0	1	1	1	1	1	1	0	0	1	1	0	0	1	0	0	1	0	0	1	1	0	0	1	0	0	1	0	1	1
GS03	Taiwan	GS	0	1	0	1	1	1	1	1	1	1	1	1	0	0	0	1	1	0	1	0	1	1	0	1	1	0	1	0	0	1	0	0	1	1	1	0	1	1	0	0	0	1	1	1	0	1	1
GS04	Taiwan	GS	0	1	1	1	1	1	1	1	1	0	1	0	1	0	0	1	1	0	1	0	1	1	0	1	1	0	0	0	0	0	0	0	0	1	1	0	0	1	0	0	0	0	1	0	0	0	0
GS05	Taiwan	GS	1	1	1	0	1	1	0	1	1	1	0	1	1	0	1	0	1	0	1	0	1	1	0	1	1	1	1	1	0	0	1	0	1	1	1	0	1	0	1	0	0	1	1	0	1	0	1
GS06	Taiwan	GS	1	1	0	0	1	0	1	1	1	1	1	1	1	1	1	1	1	0	1	0	1	1	1	1	1	0	1	1	0	1	1	0	1	1	1	1	1	1	1	0	0	1	0	1	1	1	0
GS07	Taiwan	GS	1	1	0	0	1	1	1	1	1	1	1	1	0	0	0	1	0	0	1	1	1	1	1	1	1	0	1	1	0	1	1	0	0	1	0	1	1	0	1	0	0	1	1	1	1	1	1
GS08	Taiwan	GS	1	1	0	0	1	1	1	1	1	1	1	1	0	1	0	1	0	0	1	0	0	1	0	1	1	0	1	1	0	1	1	0	0	1	0	1	1	0	0	0	0	1	1	1	0	1	0
GS09	Taiwan	GS	1	1	0	1	1	1	1	1	1	1	1	1	0	0	0	1	0	0	1	0	1	1	1	1	1	0	1	1	0	1	1	0	1	1	0	1	1	0	1	0	0	1	1	1	1	1	0
GS10	Taiwan	GS	1	1	0	1	1	1	1	1	1	1	1	1	0	0	0	1	0	0	1	1	0	1	0	1	1	0	1	1	1	1	1	0	0	1	1	0	1	0	1	0	0	1	1	1	1	1	0
GS11	Taiwan	GS	1	1	0	0	1	1	1	1	1	1	1	1	0	1	0	1	0	0	1	1	1	1	0	1	1	0	1	1	1	1	1	0	1	1	1	1	1	0	1	0	0	1	0	1	1	1	1
GS12	Taiwan	GS	0	0	0	0	0	0	1	0	0	1	1	1	1	1	0	1	1	0	1	0	0	1	1	0	1	0	0	1	0	1	1	0	1	1	1	1	0	0	0	0	0	0	0	0	1	0	1
LW01	Taiwan	LW	1	1	0	1	1	1	1	1	1	1	1	1	1	1	0	1	1	0	1	0	1	0	0	1	1	0	1	1	0	1	1	0	1	1	1	0	1	1	0	0	0	1	1	1	1	1	1
LW02	Taiwan	LW	1	0	0	0	1	1	1	0	1	1	1	0	1	1	0	1	1	0	1	0	1	1	1	1	1	0	1	1	0	1	1	0	0	1	1	0	1	0	0	0	0	1	0	1	0	1	1
LW03	Taiwan	LW	1	1	0	1	1	1	1	0	1	1	1	1	1	0	0	1	1	0	1	1	0	1	1	1	1	0	1	1	0	1	1	0	1	1	0	1	1	1	1	0	0	1	1	1	1	1	1
LW04	Taiwan	LW	1	1	0	1	1	0	1	1	1	1	1	1	1	0	0	1	0	0	1	1	0	1	1	1	1	0	1	1	0	1	1	0	0	1	0	1	1	1	1	0	0	1	1	1	1	1	0
SL01	Taiwan	SL	1	1	0	0	1	1	1	1	1	1	1	0	0	0	0	0	0	0	1	0	1	1	1	1	1	0	1	1	0	1	1	0	0	1	0	1	1	0	0	0	0	1	1	1	1	1	0
SL02	Taiwan	SL	1	1	0	1	1	1	1	1	1	1	1	0	0	0	1	1	0	0	1	0	0	1	0	1	1	0	1	1	1	1	1	0	0	1	0	1	1	1	0	0	0	1	1	1	1	1	1
SL03	Taiwan	SL	1	1	0	1	1	1	1	1	1	1	1	0	0	0	0	1	0	0	1	0	0	1	0	1	1	0	1	1	1	1	1	1	0	0	0	1	1	0	1	0	0	1	1	1	1	1	0
SL04	Taiwan	SL	1	1	0	0	1	1	1	1	1	1	1	0	1	0	0	0	1	0	1	0	1	0	0	1	1	0	1	1	0	1	1	0	1	0	0	0	1	0	0	0	0	1	0	1	1	1	1
SL05	Taiwan	SL	1	1	0	1	1	1	1	1	1	1	1	0	0	0	0	1	0	0	1	1	0	1	0	1	1	0	1	1	0	1	1	0	1	1	0	1	1	1	1	0	0	1	1	1	1	1	1
SL06	Taiwan	SL	1	1	0	1	1	1	1	1	1	1	1	1	1	0	0	1	0	0	1	1	0	1	1	1	1	0	1	1	0	1	1	0	1	1	0	0	1	1	1	1	0	1	1	1	1	1	0
SL07	Taiwan	SL	1	1	0	0	1	1	1	1	0	1	1	1	1	1	0	1	1	0	1	0	1	0	1	1	1	0	1	1	0	1	1	0	1	1	1	0	1	0	0	0	0	1	1	1	1	1	1
WS01	Taiwan	WS	1	1	0	1	1	1	1	1	1	1	1	0	0	0	0	1	0	0	1	0	0	1	1	1	1	0	1	1	0	1	1	0	1	1	0	1	1	0	0	1	0	1	1	1	1	1	1
WS02	Taiwan	WS	1	1	0	1	1	0	1	1	1	1	1	1	0	1	1	0	1	1	1	1	1	1	1	1	1	0	1	1	0	1	1	0	1	0	1	0	0	1	1	0	0	0	1	1	0	1	0
WS03	Taiwan	WS	0	1	0	1	1	0	1	1	1	1	1	1	0	1	0	1	1	0	1	1	1	1	1	1	0	0	1	1	1	1	1	0	0	0	0	0	1	1	1	1	0	0	1	1	1	1	0
WS04	Taiwan	WS	0	1	0	1	1	1	0	1	1	1	1	1	1	1	1	1	1	0	1	0	0	0	1	1	1	0	0	1	0	1	1	0	0	0	1	1	1	0	0	0	1	0	1	0	0	1	0
WS05	Taiwan	WS	1	1	1	0	1	1	1	0	0	1	0	1	1	0	1	1	1	1	1	0	1	1	1	1	0	0	1	1	0	1	1	0	1	1	1	0	1	1	1	0	0	1	0	0	1	1	0
WS06	Taiwan	WS	1	1	0	0	1	1	1	1	1	1	1	0	0	0	1	1	1	1	1	1	0	1	0	1	1	0	1	1	0	1	1	0	0	0	1	1	1	1	1	0	0	1	1	1	1	1	1
WS07	Taiwan	WS	1	1	0	1	1	1	1	1	1	1	1	1	1	0	0	1	1	1	1	1	1	1	1	1	1	1	1	1	0	0	1	0	1	0	1	1	1	1	1	0	0	1	1	1	0	1	0
WS08	Taiwan	WS	1	1	0	1	1	1	1	1	0	1	1	1	1	1	1	0	1	0	1	0	1	0	1	1	1	0	1	1	0	1	1	0	1	1	1	0	1	1	1	0	0	1	0	1	1	1	1
WS09	Taiwan	WS	1	1	0	1	1	1	1	1	1	1	1	1	0	0	0	1	1	0	1	0	1	1	1	1	1	0	1	1	0	1	1	0	0	1	0	1	1	1	1	0	1	1	1	1	1	1	0
WS10	Taiwan	WS	1	1	0	1	1	1	1	1	1	1	1	0	1	1	0	1	1	0	1	0	1	1	0	1	1	0	1	1	0	1	1	0	1	1	1	0	1	0	0	0	0	1	0	1	1	1	1
YC01	China	YC	1	1	0	0	1	0	1	0	1	1	0	1	1	0	1	0	1	0	1	1	0	1	1	1	0	0	1	0	0	1	1	0	1	1	0	0	1	0	1	0	0	0	0	1	0	1	0
YC02	China	YC	1	1	0	0	1	1	1	1	0	1	1	0	1	0	1	1	1	1	1	0	1	1	0	1	1	0	1	0	1	1	1	0	1	1	0	1	1	0	1	0	1	0	1	1	0	1	0
YC03	China	YC	1	1	0	0	1	1	1	1	1	1	1	1	1	0	0	0	1	0	1	1	0	1	1	1	0	0	1	0	0	1	1	0	0	1	0	0	1	1	1	0	0	0	1	1	0	1	0
YC04	China	YC	1	1	0	0	1	1	1	0	1	1	1	1	1	0	0	1	1	0	1	1	0	1	1	1	0	0	1	1	0	1	1	0	1	1	1	0	1	0	1	0	0	0	0	1	1	1	0
YC05	China	YC	1	1	0	1	1	1	1	0	1	1	1	1	1	0	1	0	1	0	1	1	0	1	1	1	1	0	1	0	0	1	1	0	1	1	0	0	1	0	1	0	0	0	1	1	1	1	0
YC06	China	YC	1	1	0	1	0	1	1	1	1	1	1	1	0	0	1	0	1	0	1	1	0	1	1	1	1	0	1	0	1	1	1	0	1	1	0	0	1	1	1	0	0	0	1	1	1	1	0
YC07	China	YC	1	1	0	0	1	1	1	1	1	1	1	1	1	0	0	1	1	0	1	1	0	1	1	1	1	0	0	1	1	1	1	0	1	1	0	0	1	1	1	0	0	0	1	1	1	1	0
YC08	China	YC	1	1	0	0	1	0	1	1	1	1	1	1	1	0	0	1	1	0	1	1	0	1	1	0	0	0	0	0	0	1	1	0	1	1	0	1	1	0	1	0	0	0	1	1	1	1	0
YC09	China	YC	1	1	0	1	1	0	1	1	1	1	1	1	1	0	0	1	1	0	1	1	0	1	1	1	0	0	1	0	0	1	1	0	1	1	0	0	1	0	1	0	0	0	1	1	0	1	0
YC10	China	YC	1	1	0	0	1	1	1	1	1	1	1	1	0	0	0	1	1	0	1	1	0	1	1	1	0	0	1	0	0	1	1	0	1	1	1	0	1	1	1	0	0	1	1	1	1	1	0
YC11	China	YC	1	1	0	0	1	1	1	1	1	1	1	1	1	1	0	1	1	0	1	1	0	1	1	1	0	0	1	1	0	1	1	0	1	1	0	0	1	0	1	1	0	0	1	1	1	1	0
YC12	China	YC	1	1	0	1	1	0	1	1	1	1	1	1	1	0	0	1	1	0	1	1	0	1	1	1	0	0	1	0	0	1	1	0	1	1	0	0	1	0	0	0	0	1	1	1	1	1	0
YC13	China	YC	1	1	0	0	1	1	1	1	1	1	1	1	1	0	0	1	1	0	1	1	0	1	1	1	0	0	1	0	1	1	1	0	1	1	0	0	1	0	1	0	0	0	1	1	1	1	0
YC14	China	YC	1	1	0	0	1	1	1	1	1	1	1	1	1	0	0	1	1	0	1	1	0	1	1	1	0	0	1	0	0	1	1	0	1	1	1	0	1	1	1	0	0	0	1	1	0	1	0
YC15	China	YC	1	1	0	0	1	1	1	1	1	1	1	1	1	0	0	1	1	0	1	1	0	1	1	0	0	0	1	0	0	1	1	0	1	1	0	0	1	0	1	0	0	0	1	1	1	1	0
YC16	China	YC	1	1	0	0	1	1	1	1	1	1	1	1	1	0	0	1	1	0	1	1	0	1	1	1	0	0	1	0	0	1	1	0	1	1	0	0	1	0	1	0	0	0	1	1	1	1	0
YC17	China	YC	1	1	0	0	1	1	1	1	1	1	1	1	1	0	0	1	1	0	1	1	0	1	1	0	0	0	1	0	0	1	1	0	1	1	0	0	1	0	1	0	0	0	1	1	0	1	0
YC18	China	YC	0	1	0	0	0	1	1	1	1	1	1	1	1	0	0	0	1	0	1	1	0	1	1	0	0	0	1	0	0	1	1	0	1	1	0	0	1	0	1	1	0	0	1	1	1	1	0
LV01	Vietnam	LV	1	1	0	1	1	1	1	1	0	1	1	1	0	0	0	1	1	1	1	1	1	0	1	1	1	1	0	0	0	0	0	0	1	1	0	0	1	0	1	0	0	0	1	1	0	1	0
LV02	Vietnam	LV	1	1	0	0	1	1	1	1	1	1	1	0	0	0	0	1	1	0	1	1	0	1	1	1	0	0	1	0	0	1	0	0	1	1	1	0	1	0	1	0	0	0	1	1	0	1	0
LV03	Vietnam	LV	1	1	0	1	1	0	1	0	1	1	1	0	1	0	0	1	1	0	1	1	0	1	1	1	0	0	1	0	0	1	1	0	1	1	0	0	1	0	1	1	0	0	1	1	1	1	0
LV04	Vietnam	LV	1	1	0	1	1	1	1	1	1	1	1	1	1	0	0	1	1	0	1	1	0	1	1	1	0	0	1	1	0	1	1	0	1	1	0	0	1	1	1	0	0	0	1	1	1	1	0
LV05	Vietnam	LV	1	1	0	1	1	1	1	1	1	1	1	0	0	0	0	1	1	0	1	1	1	1	1	1	1	0	1	0	0	1	1	0	1	1	1	1	1	1	1	0	0	1	0	1	1	1	0
LV06	Vietnam	LV	1	1	0	1	1	0	1	1	0	1	1	1	1	0	0	1	1	0	1	1	0	1	1	0	0	0	1	0	0	1	1	0	0	1	1	0	1	0	1	0	0	0	1	1	1	1	0
LV07	Vietnam	LV	1	1	1	0	1	1	1	1	1	1	1	0	1	0	0	1	1	0	0	1	0	1	1	1	0	0	1	0	0	1	1	0	1	1	0	1	1	1	1	0	0	0	0	1	0	1	0
LV08	Vietnam	LV	1	1	0	1	1	1	1	0	0	1	1	0	1	0	0	1	1	0	1	1	0	1	1	1	0	0	1	0	0	1	1	0	0	1	1	0	1	1	1	0	0	0	0	0	0	1	0
LV09	Vietnam	LV	1	1	0	0	0	1	1	0	1	1	1	0	0	0	0	1	1	0	1	1	0	1	1	1	0	0	1	0	0	1	1	0	0	1	0	0	0	1	1	0	0	1	0	1	0	1	0
LV10	Vietnam	LV	1	1	0	1	1	0	1	0	1	1	1	1	0	0	0	1	1	0	1	1	0	1	1	1	0	0	1	0	0	1	1	0	0	1	0	0	1	1	1	0	0	0	1	1	0	1	0
LV11	Vietnam	LV	1	1	0	1	1	1	1	0	1	1	1	0	1	0	1	1	1	0	1	1	1	1	1	1	0	0	1	0	0	1	1	0	1	1	0	0	1	0	1	0	0	0	1	1	0	1	0
LV12	Vietnam	LV	1	1	0	0	1	0	1	0	1	1	1	0	0	1	0	1	1	0	1	1	0	1	0	1	0	0	1	0	0	1	1	0	1	1	1	1	1	1	1	0	0	0	1	1	1	1	0
LV13	Vietnam	LV	1	1	0	0	0	1	1	0	1	1	1	1	0	0	0	1	1	0	1	1	1	0	1	1	0	0	1	0	0	1	1	0	1	1	0	0	1	1	0	0	0	0	1	1	1	1	0
LV14	Vietnam	LV	1	1	0	0	1	1	1	1	1	1	1	1	1	0	0	1	1	0	0	0	0	1	1	0	0	0	1	0	0	1	1	0	1	1	0	0	1	0	1	0	0	0	0	1	0	1	1
LV15	Vietnam	LV	1	1	1	0	1	1	1	1	1	1	1	1	0	0	0	1	1	0	1	1	1	1	0	1	1	0	1	0	0	1	1	0	1	1	0	0	1	1	1	0	0	0	1	1	1	1	1
LV16	Vietnam	LV	1	1	0	0	1	0	1	1	0	1	1	0	1	0	1	0	1	0	1	1	1	1	0	1	0	0	0	0	0	1	1	0	0	1	0	0	1	0	1	0	0	0	1	0	0	1	0
LV17	Vietnam	LV	0	1	0	0	1	0	0	1	1	1	1	1	1	0	1	0	0	0	1	1	1	0	1	1	0	0	1	1	0	0	1	0	1	0	0	0	0	0	1	0	0	0	0	0	0	0	0
LV18	Vietnam	LV	1	1	0	1	1	1	1	1	1	1	1	0	0	1	0	1	1	0	1	1	0	1	1	1	0	0	1	0	0	1	1	0	1	1	0	0	1	1	0	0	0	0	1	1	0	1	0
LV19	Vietnam	LV	1	1	0	1	1	1	1	0	1	1	1	1	1	0	0	1	0	0	1	0	1	1	0	1	1	0	1	1	1	1	1	0	1	1	0	1	1	0	1	0	0	1	0	1	1	1	0
LV20	Vietnam	LV	1	1	0	0	1	1	1	1	1	1	1	1	0	0	0	1	1	0	1	1	0	1	1	1	0	0	0	0	0	1	1	0	1	1	0	0	1	1	1	0	0	0	0	1	0	1	0
LV21	Vietnam	LV	1	1	0	1	1	1	1	1	1	1	1	1	1	0	0	1	1	0	1	1	0	1	0	1	0	0	1	0	1	1	1	0	1	1	1	0	1	0	1	0	0	0	1	1	1	1	0
LV22	Vietnam	LV	1	1	0	0	1	1	1	1	1	1	1	1	1	0	0	1	1	0	1	1	0	1	0	1	0	0	1	0	0	1	1	0	1	1	1	0	1	1	1	0	0	1	1	1	0	1	0
LV23	Vietnam	LV	1	1	0	0	1	1	1	1	1	1	1	1	1	0	1	1	1	0	1	1	1	1	1	0	1	0	1	1	0	1	1	0	1	1	0	0	1	1	1	1	0	0	0	1	1	1	0
LV24	Vietnam	LV	1	1	0	1	1	0	1	0	1	1	1	1	0	0	1	1	1	0	1	1	1	1	0	1	0	0	1	0	0	1	1	0	1	1	0	0	1	1	1	0	0	1	1	1	0	1	0
LV25	Vietnam	LV	1	1	0	0	1	1	1	0	1	1	1	1	0	0	1	1	1	0	1	1	0	0	1	1	0	0	1	0	0	1	1	0	0	0	1	0	0	1	0	0	0	0	1	1	0	1	0
LV26	Vietnam	LV	1	1	0	1	1	1	1	1	1	0	1	1	0	0	1	0	1	0	1	1	1	1	1	1	0	0	0	1	0	1	1	0	1	1	0	1	1	1	1	0	0	0	1	0	1	0	0
LV27	Vietnam	LV	1	1	1	0	1	1	0	1	1	1	1	1	0	0	1	1	1	0	1	1	1	1	0	1	1	0	0	0	0	1	0	0	1	1	1	0	1	1	1	0	0	0	0	0	0	1	0
LV28	Vietnam	LV	1	1	0	1	1	1	1	1	1	1	1	1	1	0	1	1	1	0	1	1	0	1	0	1	0	0	1	0	0	1	0	0	1	1	0	1	1	1	0	0	0	0	1	1	1	1	0
LV29	Vietnam	LV	1	1	1	0	1	1	0	1	1	1	1	0	0	0	1	1	1	1	1	1	1	1	1	1	0	0	1	0	0	1	1	0	0	1	0	1	1	1	1	1	0	0	0	1	1	1	0
LV30	Vietnam	LV	1	1	0	1	1	1	1	1	0	1	1	1	0	0	0	0	1	0	1	1	0	1	1	1	0	0	1	0	0	1	1	0	1	1	1	0	1	1	1	0	0	0	1	1	1	1	0
LV31	Vietnam	LV	1	1	1	0	1	1	1	1	1	1	1	1	0	0	0	1	1	0	1	1	0	0	0	1	0	0	1	0	1	1	1	0	0	1	1	1	1	1	1	1	0	0	1	1	1	1	1
LV32	Vietnam	LV	1	1	0	1	1	1	1	1	0	1	1	0	1	0	1	1	1	0	1	1	0	1	1	1	1	0	1	0	0	1	1	0	1	1	0	0	1	0	1	0	0	0	1	1	0	1	0
LV33	Vietnam	LV	0	1	0	0	1	0	0	1	0	1	0	1	1	1	0	0	1	1	1	0	0	0	0	1	0	1	1	1	0	0	1	0	1	1	0	0	1	1	1	0	0	0	1	0	0	1	1
[truncated: 1,366 more columns]
